# Supplementary material for: Mass media campaigns to reduce unnecessary caesarean sections: a systematic review
Source: PubMed Central journal article supplement (PMC7146028; doi:10.1136/bmjgh-2019-001935), 2020-02-26

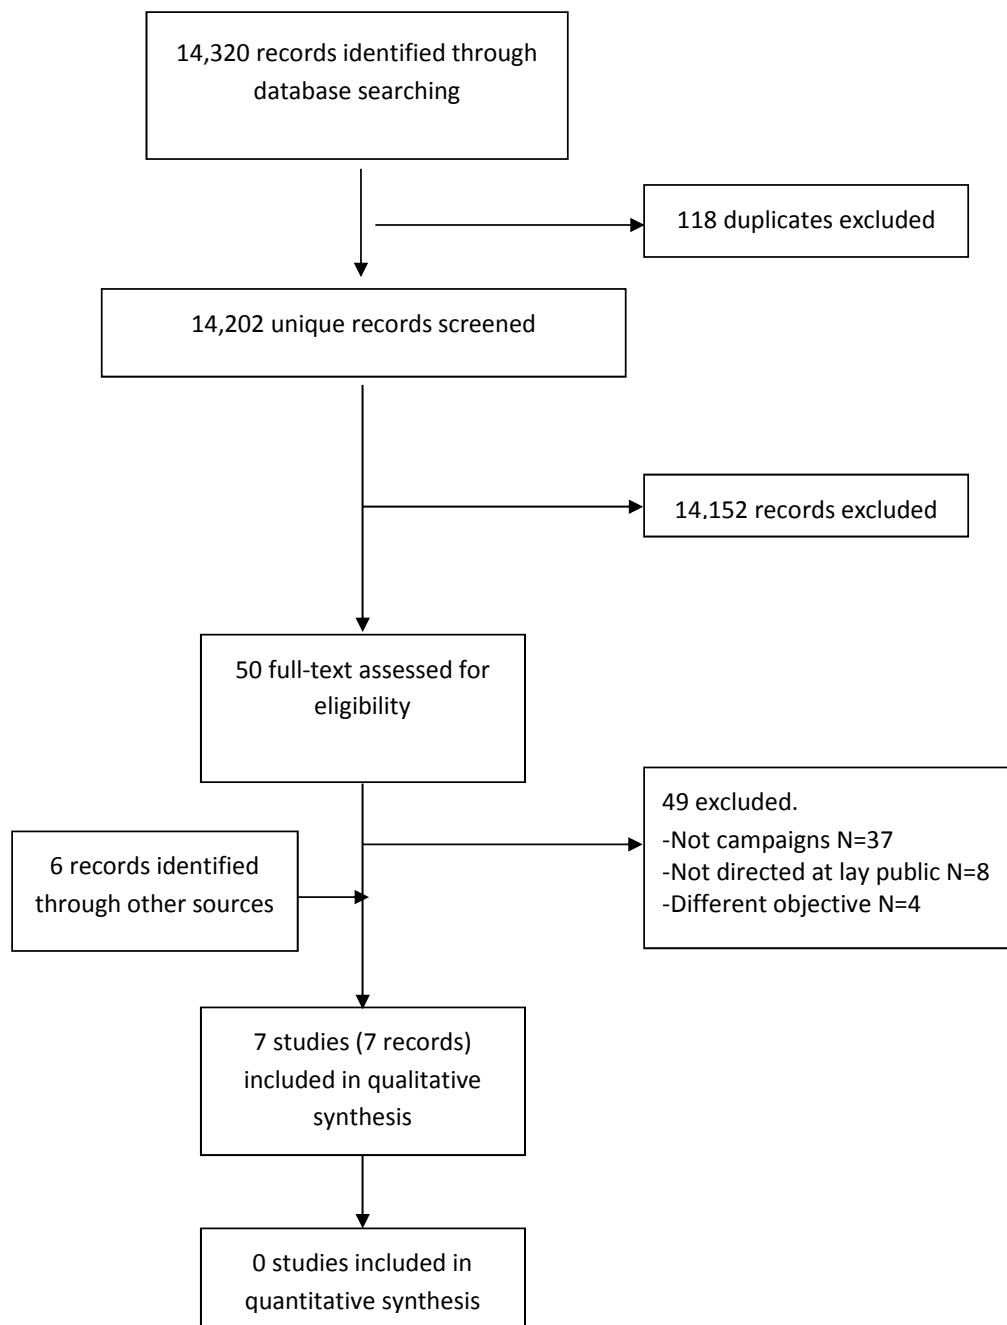

Supplement: bmjgh-2019-001935supp004.pdf [file bmjgh-2019-001935supp004.pdf]
